# Supplementary material for: Alpinetin Suppresses Zika Virus-Induced Interleukin-1β Production and Secretion in Human Macrophages
Source: MDPI journal article supplement (doi:10.3390/pharmaceutics14122800), 2022-12-14

## Supplementary data

**Table S1.** Structure and mass of Alpinetin (7-Hydroxy-5-methoxyflavanone).

| Compound                                                                                         | Structures                                                                         | Molecular weight (MW) |
|--------------------------------------------------------------------------------------------------|------------------------------------------------------------------------------------|-----------------------|
| <p>Alpinetin<br/>(7-Hydroxy-5-methoxyflavanone )</p> <p>Purity (HPLC-DAD, 300nm) =<br/>99.3%</p> | 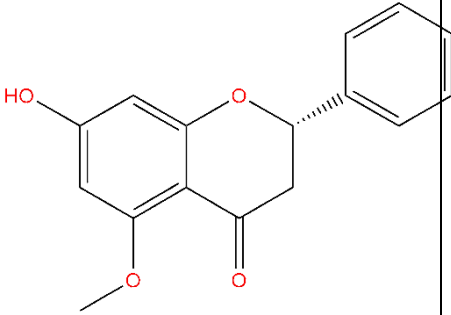 | 270.284 g/mol         |

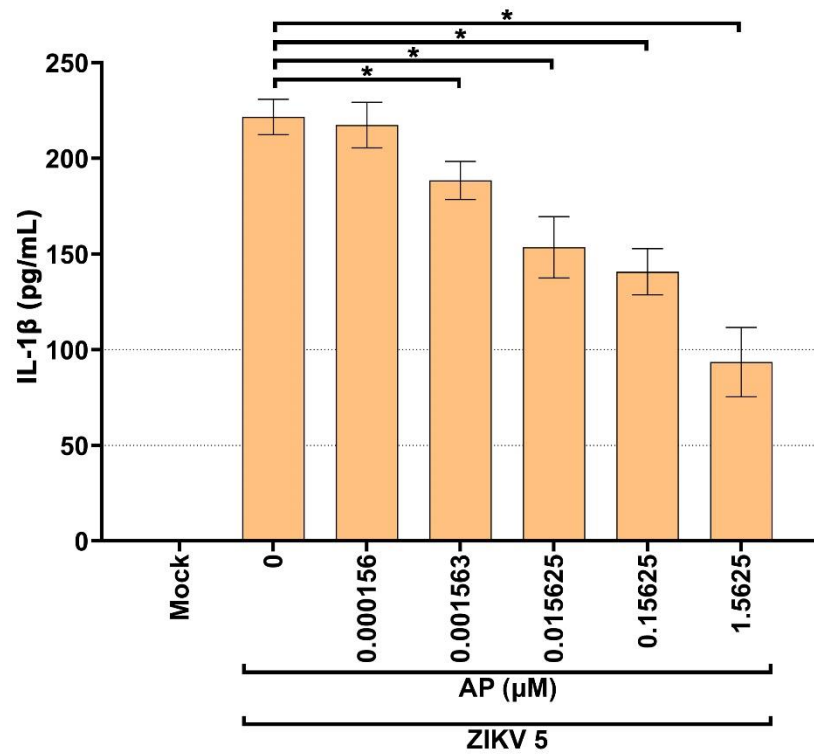

**Figure S1.** ELISA assay determining level of IL-1 $\beta$  in the culture supernatants collected from THP-1 macrophages infected with ZIKV at MOI 5 (ZIKV 5) with the presence of various concentrations of AP (0 to 1.5625  $\mu$ M) for 48 h.

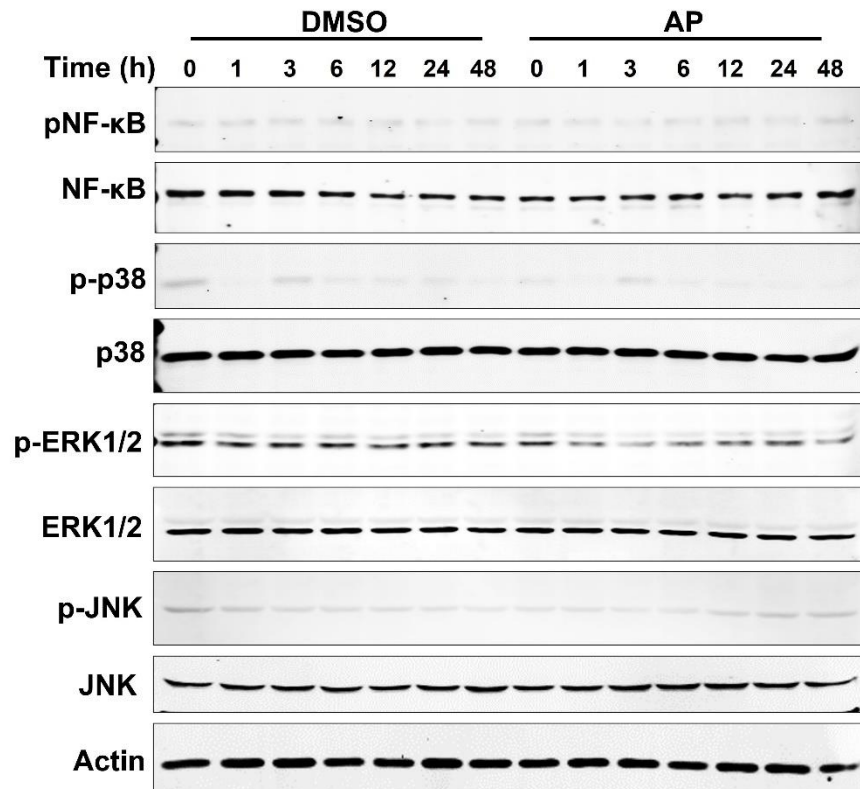

**Figure S2.** Determination of effects of AP on the phosphorylation status of NF- $\kappa$ B, p38, ERK1/2, and JNK in TPA-induced THP-1 macrophage over the course of 48 h without Zika infection. Western blot analysis detecting phosphorylated NF- $\kappa$ B (pNF- $\kappa$ B), total NF- $\kappa$ B (NF- $\kappa$ B), phosphorylated p38 (p-p38), total p38 (p38), phosphorylated ERK1/2 (p-ERK1/2), total ERK1/2 (ERK1/2), phosphorylated JNK (p-JNK), total JNK (JNK), and actin in the lysates of TPA-induced THP-1 macrophages treated with 6.25  $\mu$ M AP at various time points (0-48 h).

Original Western blot for Figure 2B

Immunoblot: IL-1β

Red box represents the cropped image used in manuscript figure 2B.

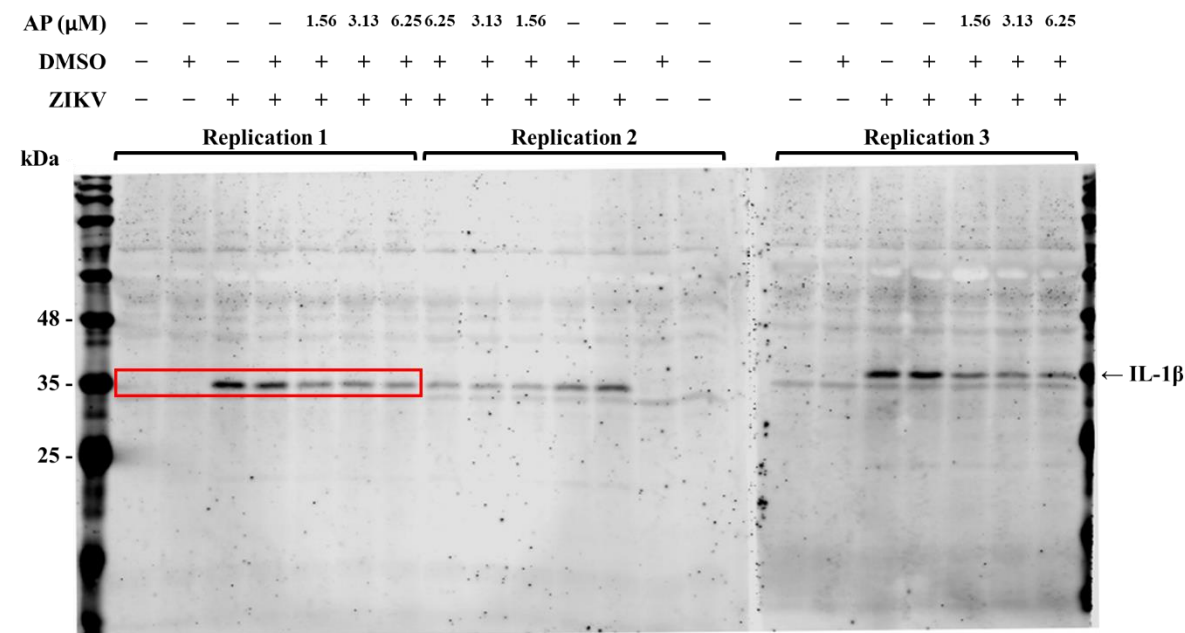

Ratio of Western blot for Figure 2D: IL-1β (fold change)

| Mock  |      |      |      |      |      | ZIKV 5 |       |       |       |       |       |         |      |      |      |      |      |      |      |      |
|-------|------|------|------|------|------|--------|-------|-------|-------|-------|-------|---------|------|------|------|------|------|------|------|------|
| Media |      |      | DMSO |      |      | Media  |       |       | DMSO  |       |       | AP (μM) |      |      |      |      |      |      |      |      |
|       |      |      |      |      |      |        |       |       |       |       |       | 1.56    |      |      | 3.13 |      |      | 6.25 |      |      |
| 1.00  | 1.00 | 1.00 | 0.57 | 1.53 | 0.11 | 20.77  | 55.04 | 29.39 | 15.67 | 25.18 | 29.72 | 3.53    | 5.79 | 4.73 | 3.49 | 6.76 | 2.43 | 2.24 | 7.50 | 5.00 |

Original Western blot for Figure 2C

Immunoblot: ZIKV E

Red box represents the cropped image used in manuscript figure 2C.

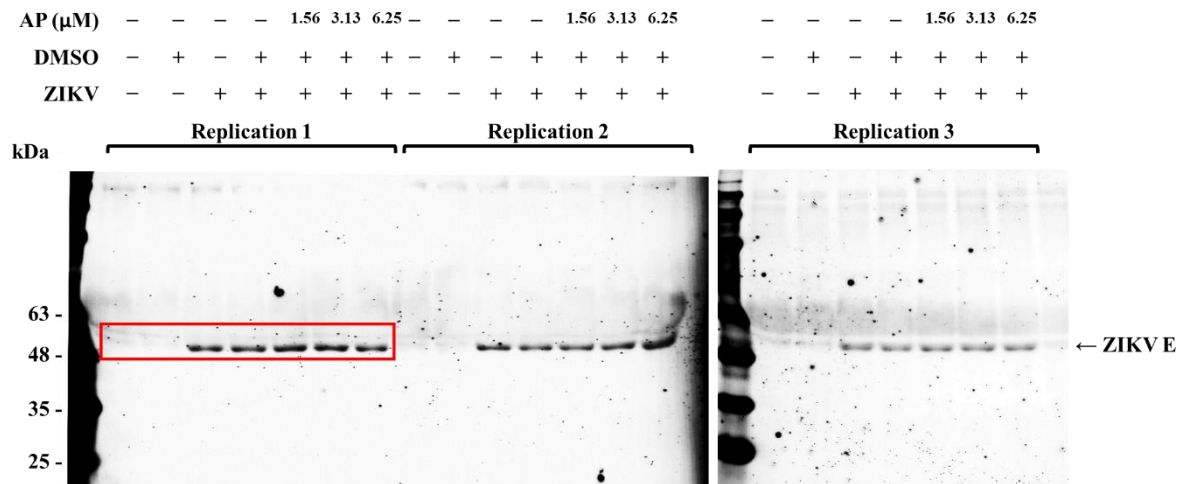

Ratio of Western blot for Figure 2E: ZIKV E (fold change)

| Mock  |      |      |      |      |      | ZIKV 5 |       |       |       |       |       |         |       |       |       |       |       |       |       |       |
|-------|------|------|------|------|------|--------|-------|-------|-------|-------|-------|---------|-------|-------|-------|-------|-------|-------|-------|-------|
| Media |      |      | DMSO |      |      | Media  |       |       | DMSO  |       |       | AP (μM) |       |       |       |       |       |       |       |       |
|       |      |      |      |      |      |        |       |       |       |       |       | 1.56    |       |       | 3.13  |       |       | 6.25  |       |       |
| 1.00  | 1.00 | 1.00 | 0.27 | 0.97 | 0.46 | 78.35  | 50.28 | 95.43 | 77.45 | 37.33 | 60.15 | 103.74  | 40.76 | 68.88 | 99.83 | 54.29 | 68.61 | 74.25 | 90.64 | 57.17 |

Original Western blot for Figure 5A

Immunoblot: IL-1 $\beta$

Red box represents the cropped image used in manuscript figure 5A: IL-1 $\beta$ .

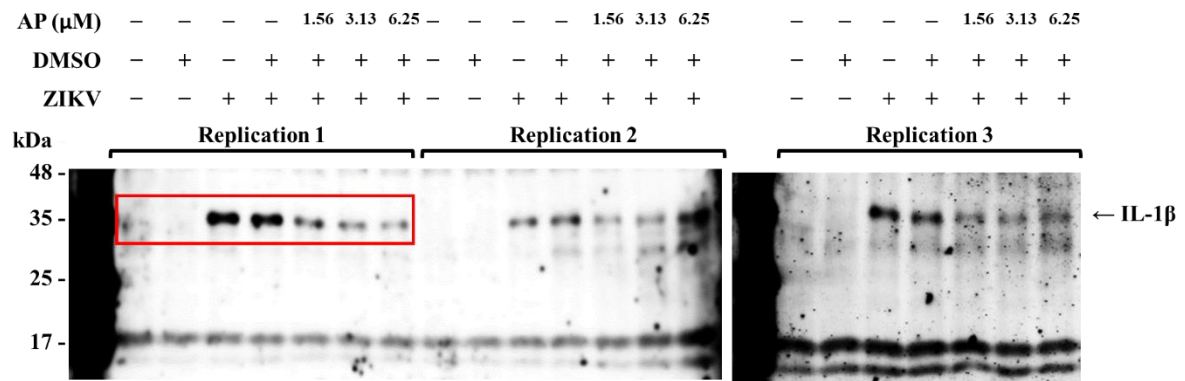

Original Western blot for Figure 5A

Immunoblot: ZIKV E

Red box represents the cropped image used in manuscript figure 5A: ZIKV E.

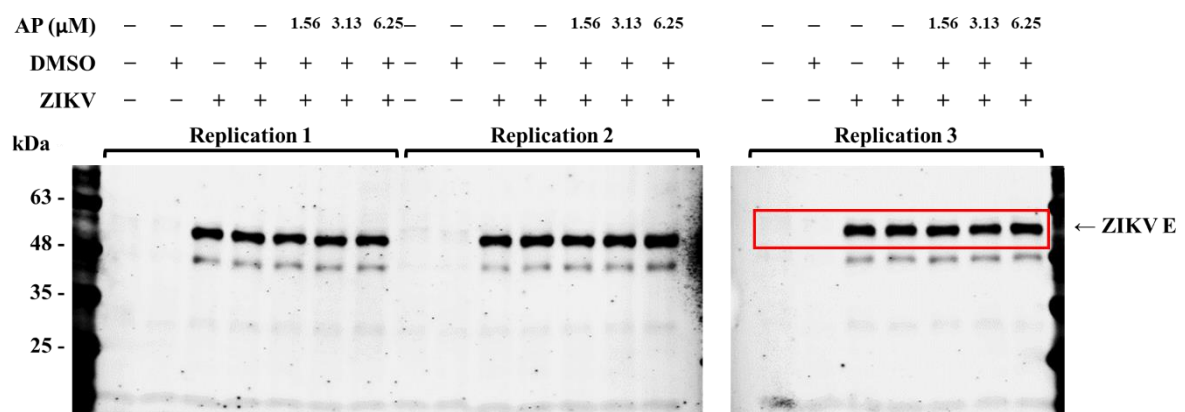

Original Western blot for Figure 5A

Immunoblot: ZIKV NS5

Red box represents the cropped image used in manuscript figure 5A: ZIKV NS5.

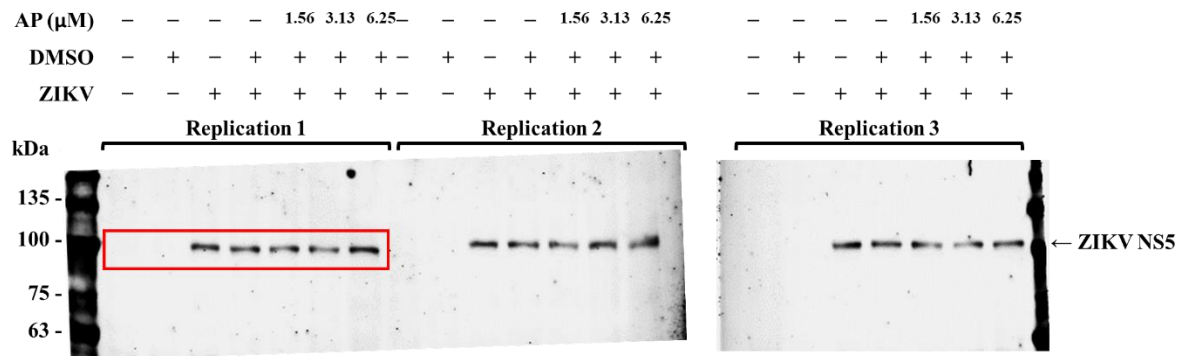

Original Western blot for Figure 5A

Immunoblot: Actin

Red box represents the cropped image used in manuscript figure 5A: Actin.

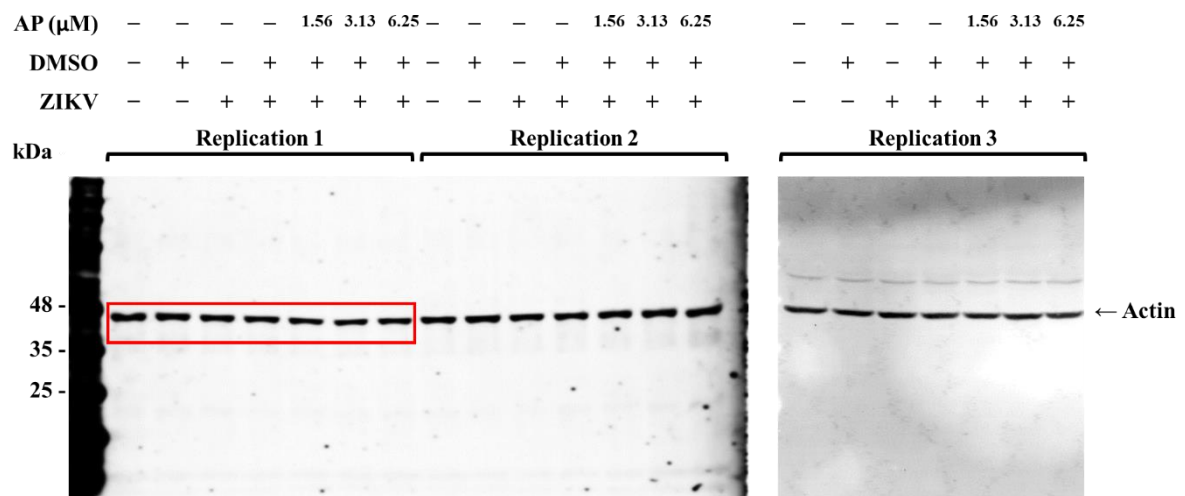

Ratio of Western blot for Figure 5B: IL-1 $\beta$ /actin (fold change)

| Mock  |      |      |      |      |      | ZIKV 5 |      |       |       |       |       |               |      |      |      |      |      |      |      |       |
|-------|------|------|------|------|------|--------|------|-------|-------|-------|-------|---------------|------|------|------|------|------|------|------|-------|
| Media |      |      | DMSO |      |      | Media  |      |       | DMSO  |       |       | AP ( $\mu$ M) |      |      |      |      |      |      |      |       |
|       |      |      |      |      |      |        |      |       |       |       |       | 1.56          |      |      | 3.13 |      |      | 6.25 |      |       |
| 0.61  | 1.52 | 0.87 | 0.96 | 0.97 | 0.37 | 53.52  | 48.9 | 43.35 | 48.92 | 28.53 | 44.96 | 9.04          | 3.15 | 12.5 | 9.8  | 3.43 | 5.62 | 4.55 | 4.97 | 11.47 |

Ratio of Western blot for Figure 5C: ZIKV E/actin (fold change)

| Mock  |      |      |      |      |      | ZIKV 5 |     |      |       |       |      |               |      |      |       |      |     |       |      |      |
|-------|------|------|------|------|------|--------|-----|------|-------|-------|------|---------------|------|------|-------|------|-----|-------|------|------|
| Media |      |      | DMSO |      |      | Media  |     |      | DMSO  |       |      | AP ( $\mu$ M) |      |      |       |      |     |       |      |      |
|       |      |      |      |      |      |        |     |      |       |       |      | 1.56          |      |      | 3.13  |      |     | 6.25  |      |      |
| 0.78  | 0.91 | 1.31 | 0.25 | 0.52 | 0.44 | 9.69   | 9.7 | 8.88 | 10.28 | 10.53 | 9.22 | 9.52          | 8.26 | 8.56 | 10.77 | 8.31 | 8.2 | 10.13 | 7.91 | 9.03 |

Ratio of Western blot for Figure 5D: ZIKV NS5/actin (fold change)

| Mock  |      |      |      |      |      | ZIKV 5 |     |      |      |     |      |               |      |      |      |      |     |       |      |      |
|-------|------|------|------|------|------|--------|-----|------|------|-----|------|---------------|------|------|------|------|-----|-------|------|------|
| Media |      |      | DMSO |      |      | Media  |     |      | DMSO |     |      | AP ( $\mu$ M) |      |      |      |      |     |       |      |      |
|       |      |      |      |      |      |        |     |      |      |     |      | 1.56          |      |      | 3.13 |      |     | 6.25  |      |      |
| 0.54  | 1.19 | 1.27 | 0.31 | 0.27 | 0.25 | 9.28   | 9.2 | 11.5 | 8.93 | 8.4 | 10.6 | 8.48          | 5.85 | 8.06 | 9.38 | 8.21 | 7.1 | 13.15 | 9.23 | 9.96 |



Original Western blot for Figure 6B

Immunoblot: pNF- $\kappa$ B

Red box represents the cropped image used in manuscript figure 6B: pNF- $\kappa$ B.

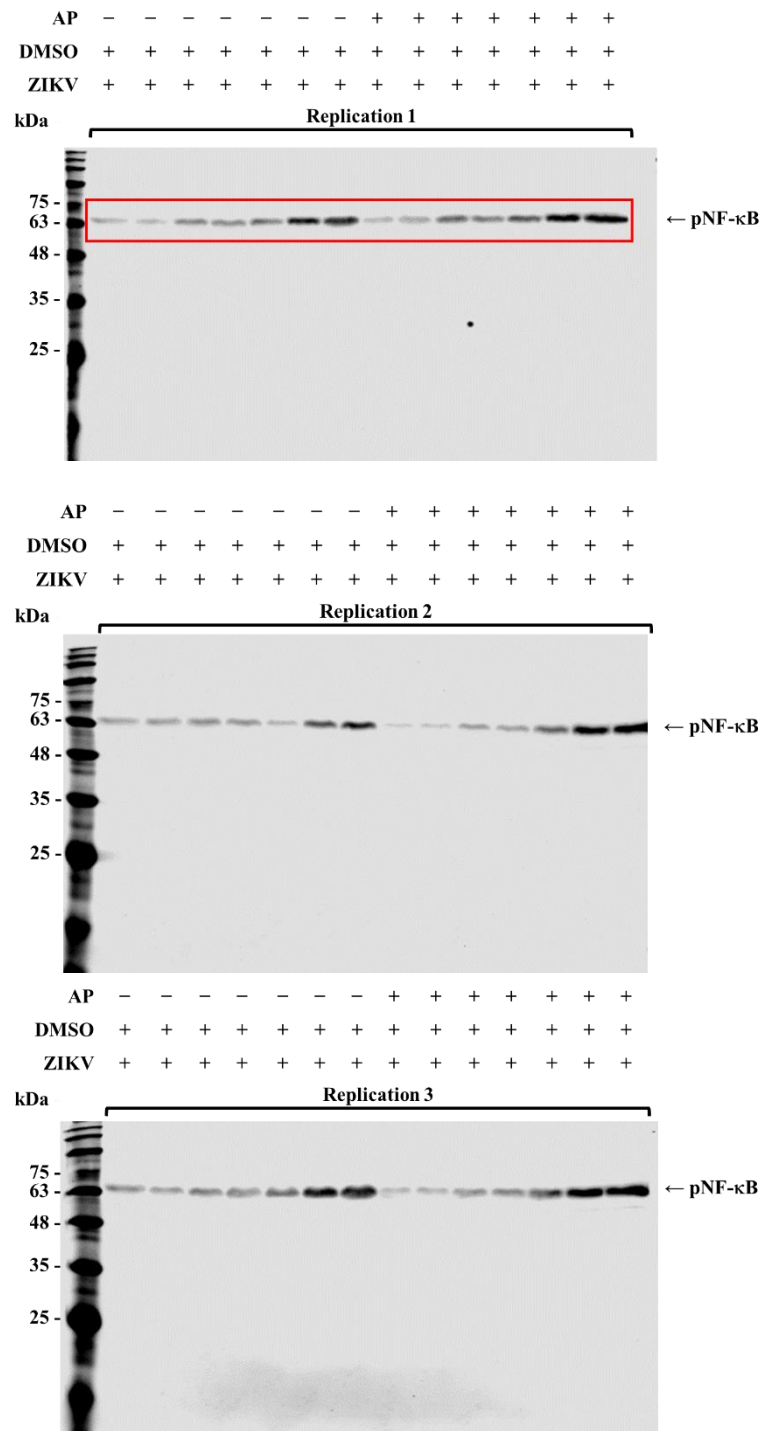

Original Western blot for Figure 6B

Immunoblot: NF- $\kappa$ B

Red box represents the cropped image used in manuscript figure 6B: NF- $\kappa$ B.

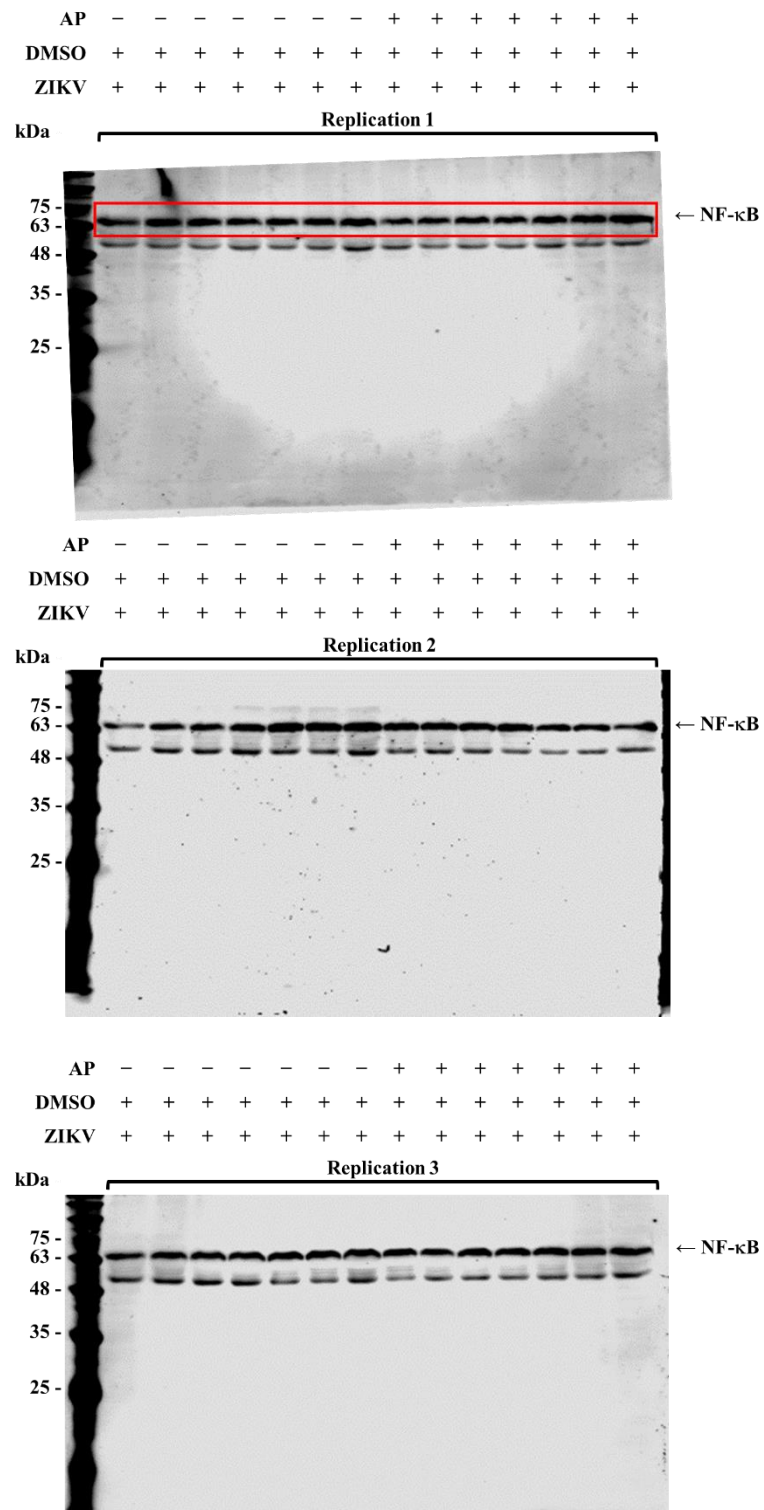

Ratio of Western blot for Figure 6C: Phospho NF- $\kappa$ B (fold change)

| Time<br>(h.p.i.) | ZIKV  |       |       |       |       |       |
|------------------|-------|-------|-------|-------|-------|-------|
|                  | DMSO  |       |       | AP    |       |       |
| 0                | 1.000 | 1.000 | 1.000 | 0.515 | 1.393 | 1.531 |
| 1                | 0.866 | 0.672 | 0.322 | 0.259 | 0.521 | 0.710 |
| 3                | 1.146 | 1.064 | 1.141 | 0.648 | 0.853 | 2.167 |
| 6                | 0.999 | 1.031 | 1.414 | 0.756 | 1.085 | 1.769 |
| 12               | 0.517 | 1.446 | 1.754 | 1.988 | 2.143 | 2.868 |
| 24               | 1.826 | 3.135 | 3.990 | 3.612 | 3.573 | 5.547 |
| 48               | 2.631 | 3.725 | 4.868 | 3.676 | 4.345 | 6.871 |

Original Western blot for Figure 7B

Immunoblot: p-p38

Red box represents the cropped image used in manuscript figure 7B: p-p38.

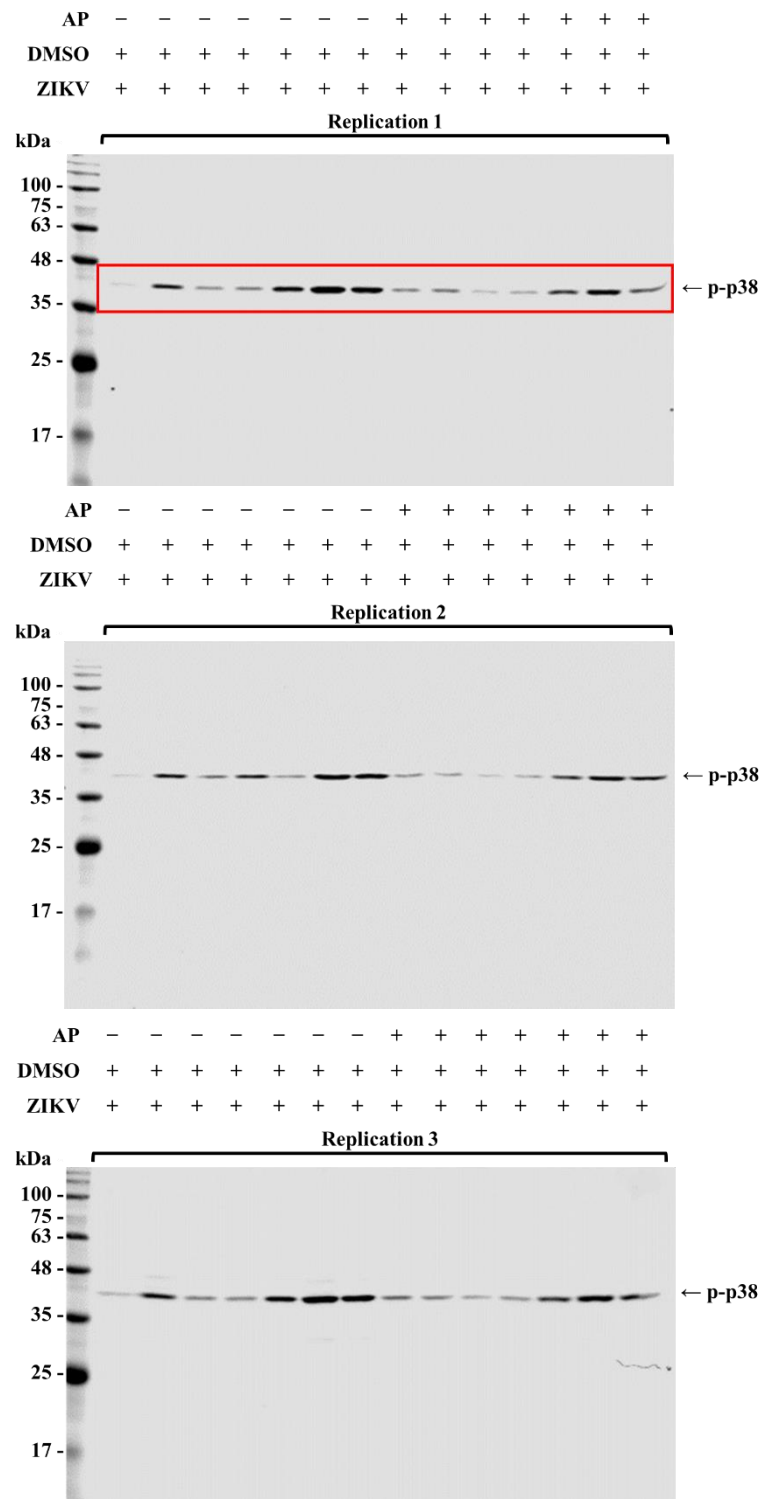

Original Western blot for Figure 7B

Immunoblot: p38

Red box represents the cropped image used in manuscript figure 7B: p38.

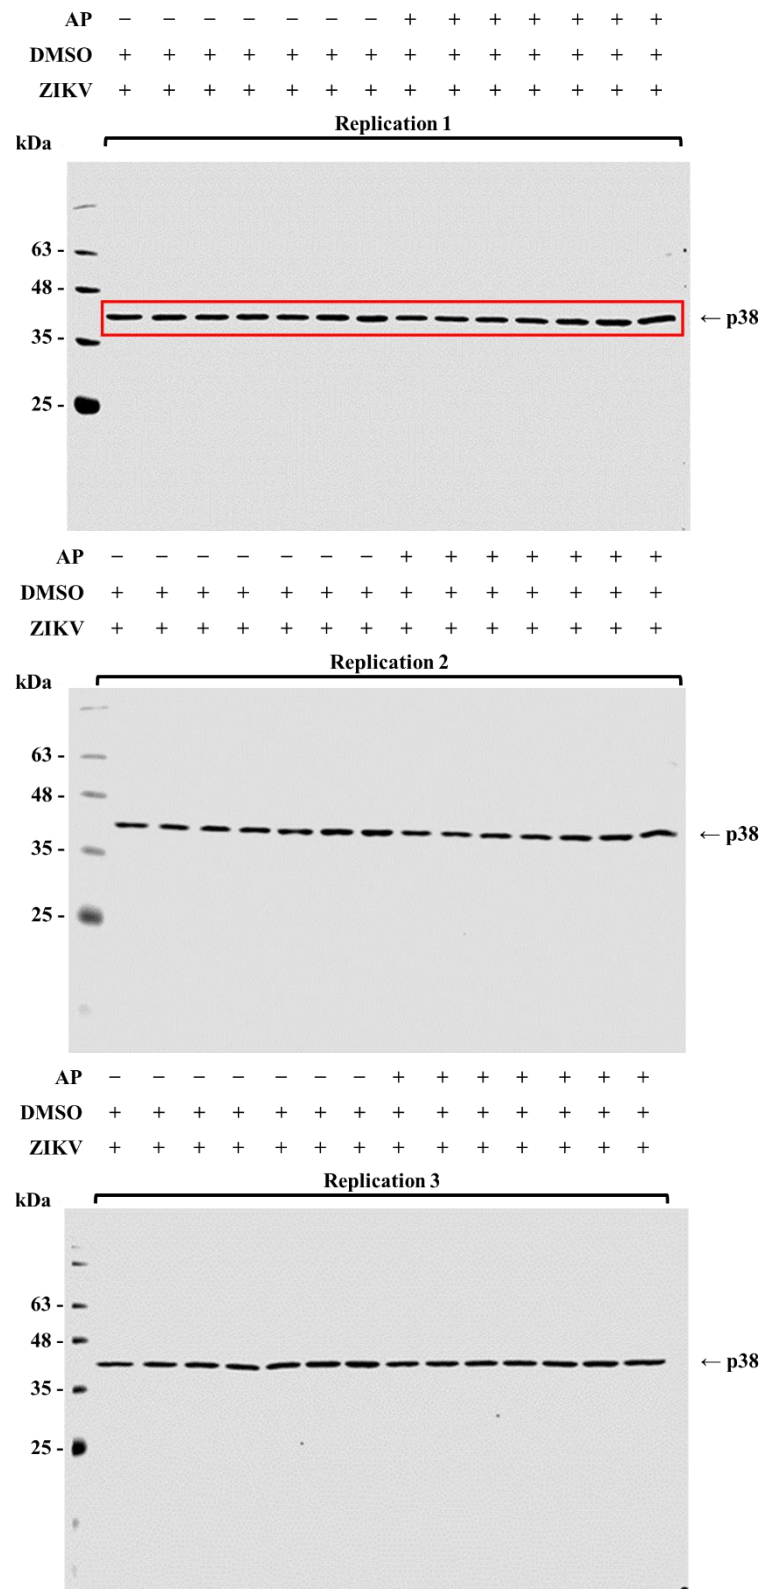

Ratio of Western blot for Figure 7C: Phospho p38 (fold change)

| Time<br>(h.p.i.) | ZIKV  |       |       |       |       |       |
|------------------|-------|-------|-------|-------|-------|-------|
|                  | DMSO  |       |       | AP    |       |       |
| 0                | 1.00  | 1.00  | 1.00  | 14.18 | 11.38 | 12.46 |
| 1                | 22.81 | 21.89 | 20.39 | 5.88  | 8.81  | 7.53  |
| 3                | 10.66 | 11.24 | 10.52 | 1.72  | 3.24  | 2.68  |
| 6                | 5.48  | 6.85  | 5.69  | 3.48  | 1.20  | 2.72  |
| 12               | 25.67 | 26.78 | 25.18 | 19.09 | 17.70 | 17.05 |
| 24               | 44.57 | 48.02 | 44.20 | 35.41 | 32.90 | 31.30 |
| 48               | 44.10 | 40.25 | 40.30 | 16.88 | 16.78 | 16.55 |

Original Western blot for Figure 8B

Immunoblot: p-ERK1/2

Red box represents the cropped image used in manuscript figure 8B: p-ERK1/2.

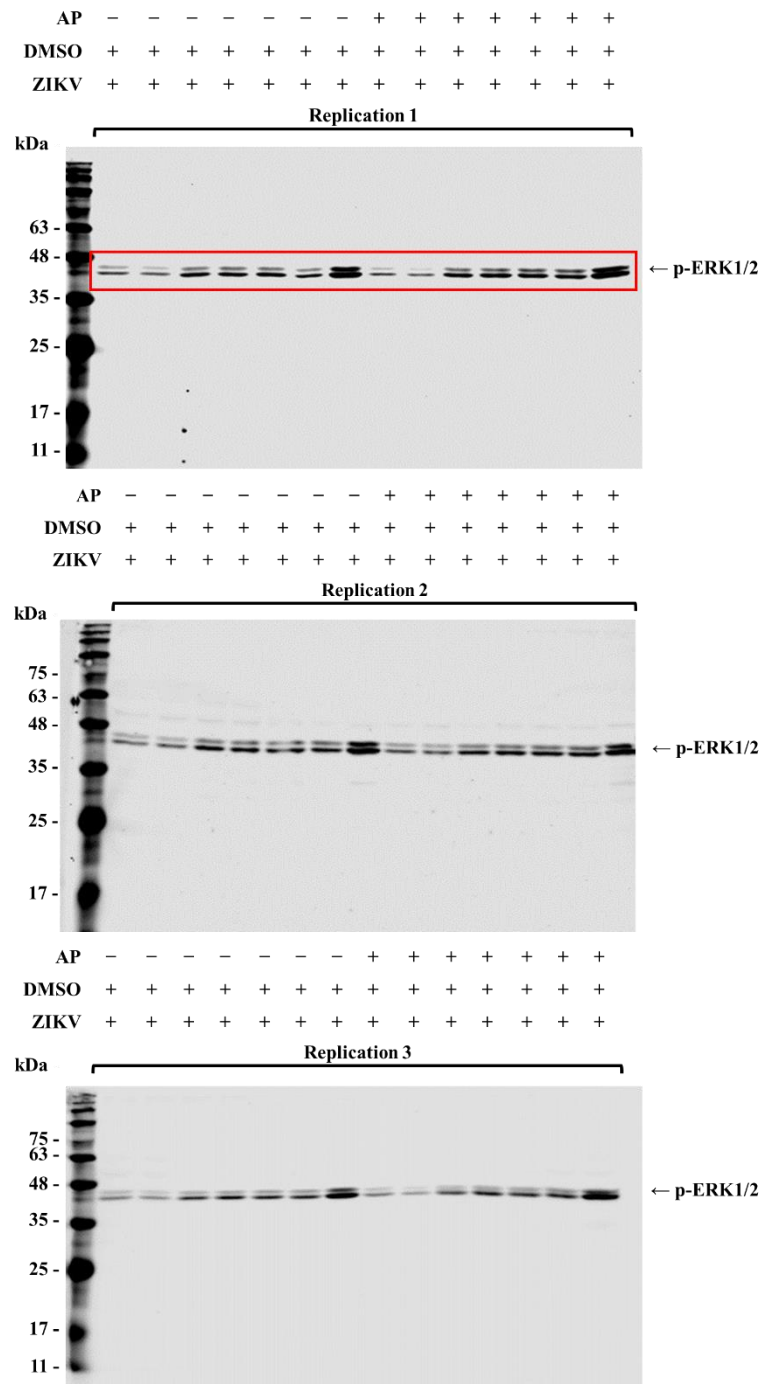

Original Western blot for Figure 8B

Immunoblot: ERK1/2

Red box represents the cropped image used in manuscript figure 8B: ERK1/2.

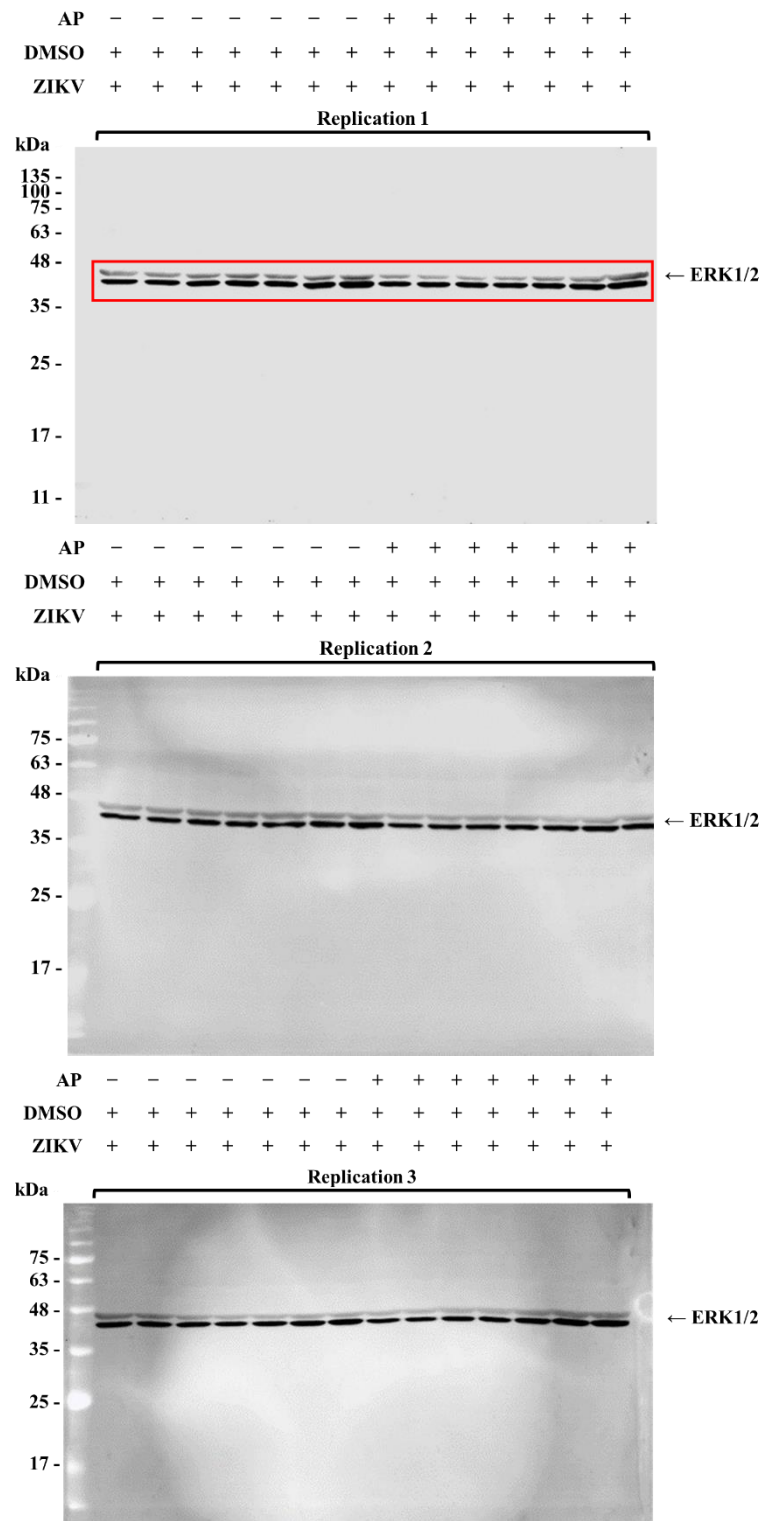



Ratio of Western blot for Figure 8C: Phospho ERK1/2 (fold change)

| Time     | ZIKV  |       |       |       |       |       |
|----------|-------|-------|-------|-------|-------|-------|
| (h.p.i.) | DMSO  |       |       | AP    |       |       |
| 0        | 1.000 | 1.000 | 1.000 | 1.226 | 1.832 | 1.737 |
| 1        | 0.586 | 0.911 | 0.438 | 0.509 | 0.983 | 0.461 |
| 3        | 1.036 | 2.003 | 1.860 | 1.078 | 2.034 | 2.036 |
| 6        | 1.427 | 2.413 | 2.305 | 1.717 | 2.591 | 2.997 |
| 12       | 1.437 | 2.044 | 2.175 | 1.856 | 2.727 | 3.467 |
| 24       | 1.446 | 2.717 | 1.695 | 2.158 | 2.914 | 3.343 |
| 48       | 2.387 | 4.243 | 5.112 | 2.778 | 3.860 | 5.769 |

Original Western blot for Figure 9B

Immunoblot: p-JNK

Red box represents the cropped image used in manuscript figure 9B: p-JNK.

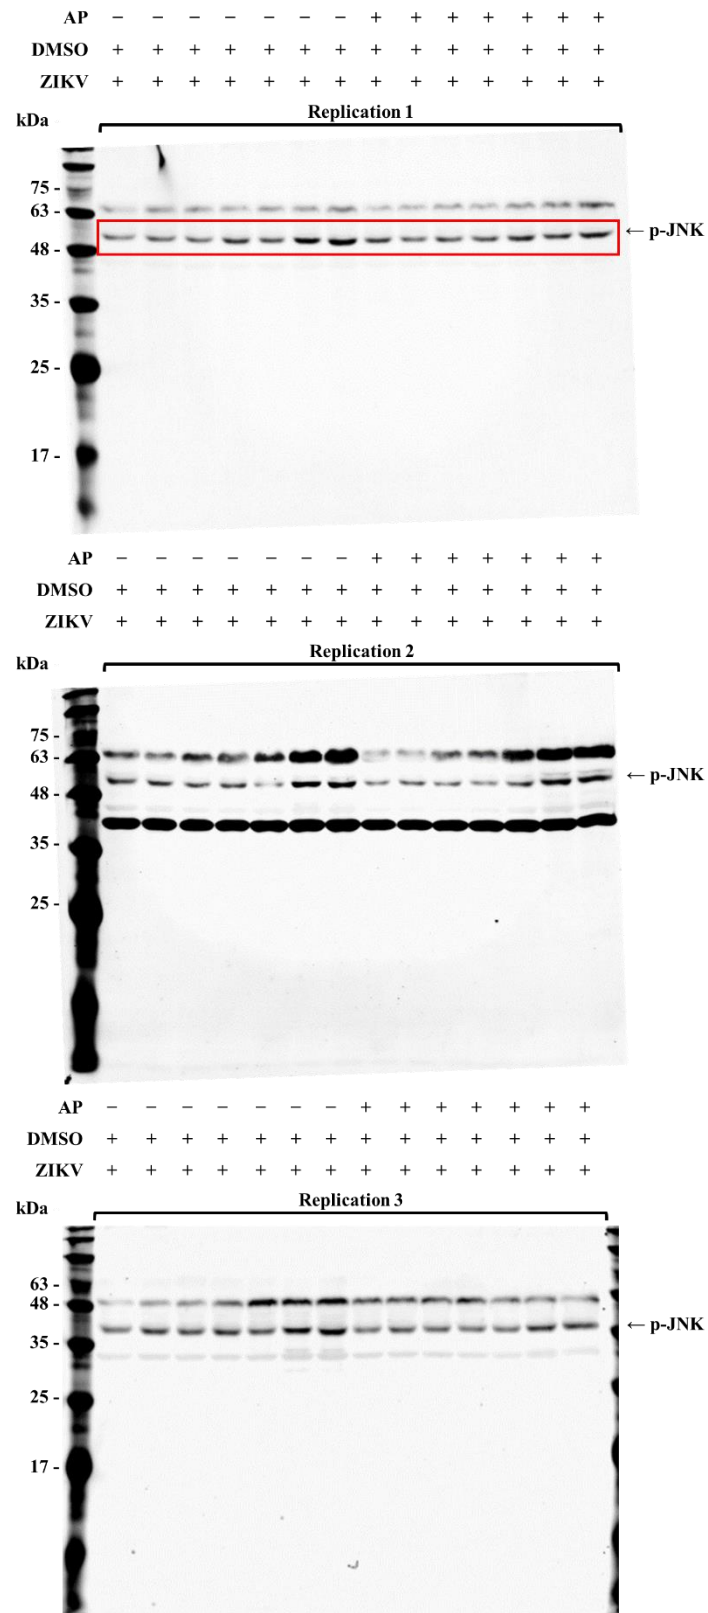

Original Western blot for Figure 9B

Immunoblot: JNK

Red box represents the cropped image used in manuscript figure 9B: JNK.

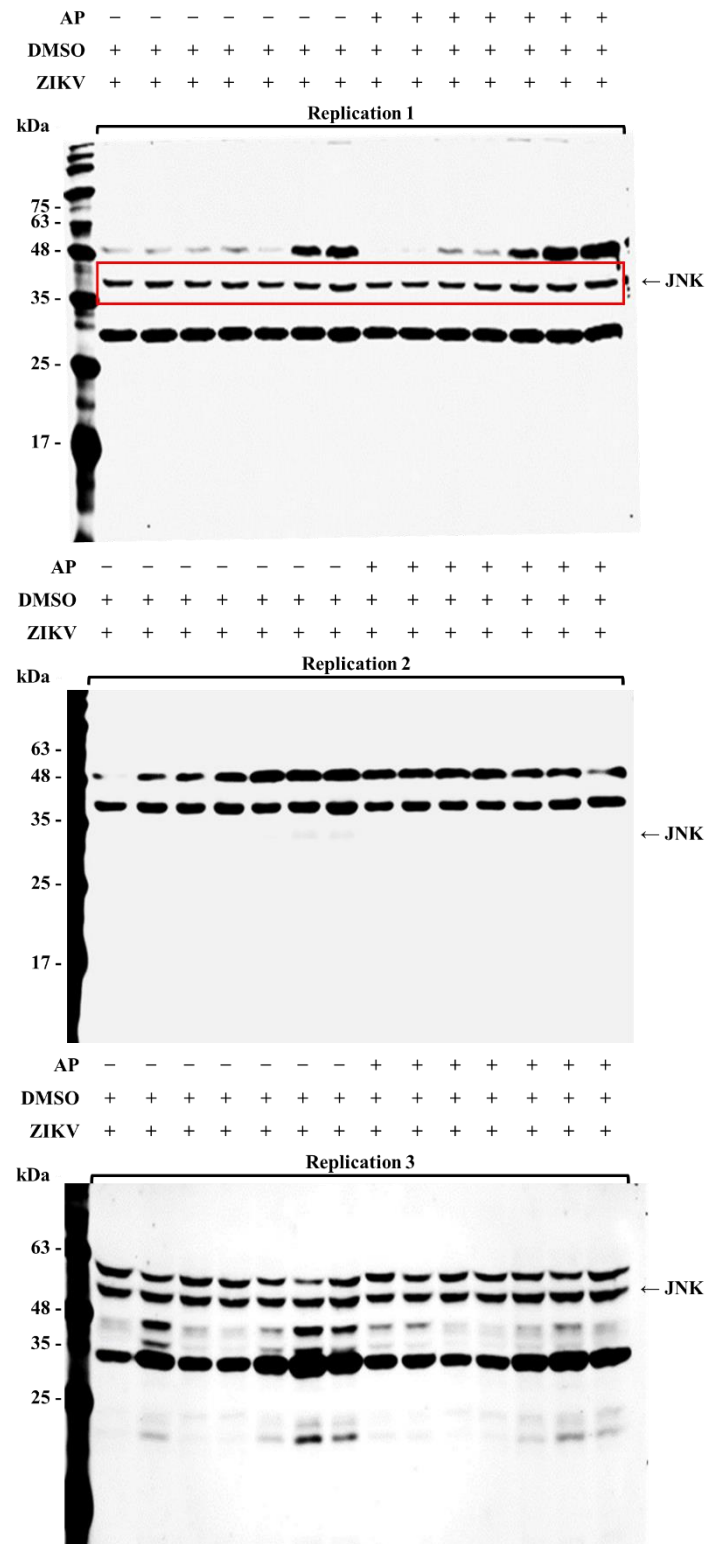

Ratio of Western blot for Figure 9C: Phospho JNK (fold change)

| Time     | ZIKV  |       |       |       |       |       |
|----------|-------|-------|-------|-------|-------|-------|
| (h.p.i.) | DMSO  |       |       | AP    |       |       |
| 0        | 1.000 | 1.000 | 1.000 | 1.963 | 0.429 | 1.140 |
| 1        | 1.194 | 0.794 | 1.537 | 1.225 | 0.398 | 1.447 |
| 3        | 0.966 | 0.497 | 1.490 | 1.306 | 0.269 | 1.089 |
| 6        | 1.707 | 0.682 | 1.666 | 1.287 | 0.227 | 1.092 |
| 12       | 1.283 | 0.215 | 1.449 | 1.868 | 0.716 | 0.990 |
| 24       | 2.303 | 1.492 | 1.956 | 1.947 | 1.665 | 1.763 |
| 48       | 2.917 | 1.680 | 2.318 | 2.404 | 1.822 | 1.995 |

Original Western blot for Figure 6B-9B

Immunoblot: Actin

Red box represents the cropped image used in manuscript figure 6B-9B: Actin.

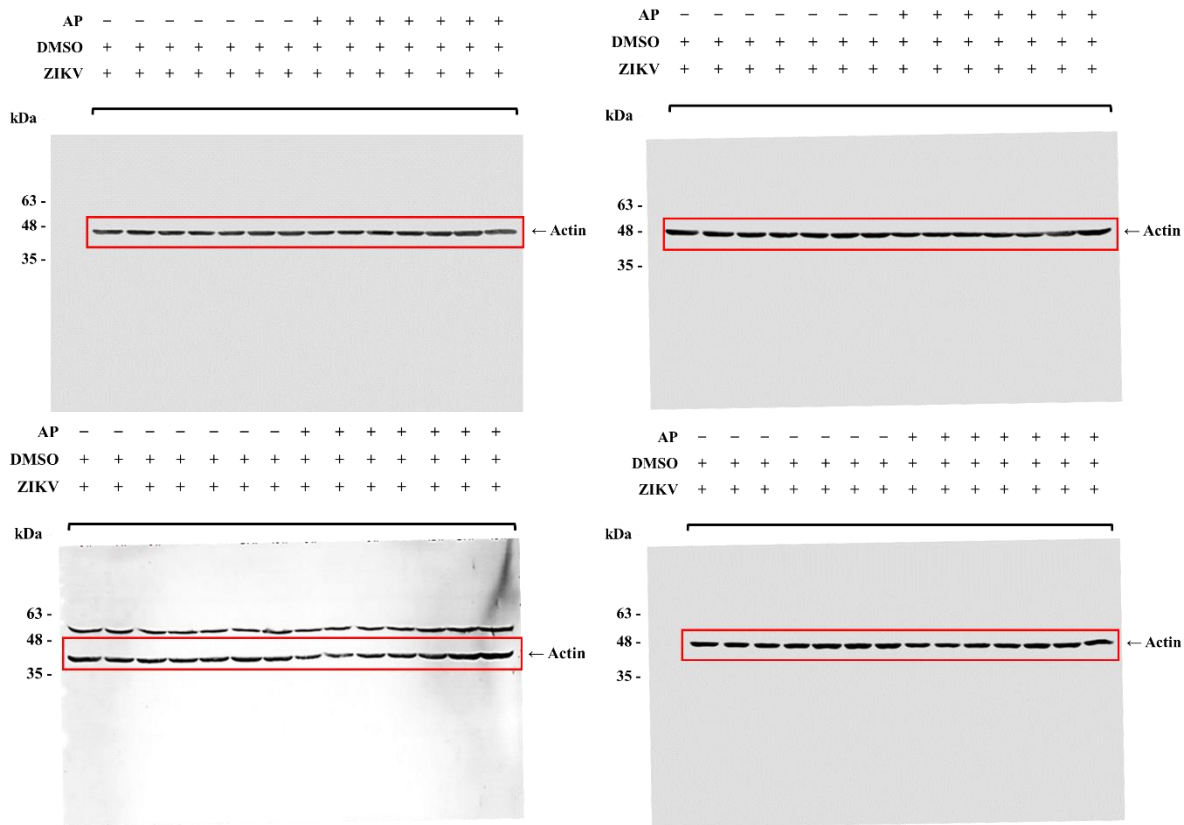

Supplement: s1 [file s1]
